# Supplementary material for: Variability in detection of SARS-CoV-2-specific antibody responses following mild infection: a prospective multicentre cross-sectional study, London, United Kingdom, 17 April to 17 July 2020
Source: PubMed Central journal article supplement (PMC8796290; doi:10.2807/1560-7917.es.2022.27.4.2002076), 2022-01-27
Supplement: 20-02076_PALLETT_Supplement.pdf [file 20-02076_PALLETT_Supplement.pdf]

## Supplementary information

This supplementary material is hosted by *Eurosurveillance* as supporting information alongside the article "*Variability in detection of SARS-CoV-2-specific antibody responses following mild infection: a prospective multicentre cross-sectional study, London, United Kingdom, 17 April to 17 July 2020*", on behalf of the authors, who remain responsible for the accuracy and appropriateness of the content. The same standards for ethics, copyright, attributions and permissions as for the article apply. Supplements are not edited by *Eurosurveillance* and the journal is not responsible for the maintenance of any links or email addresses provided therein.

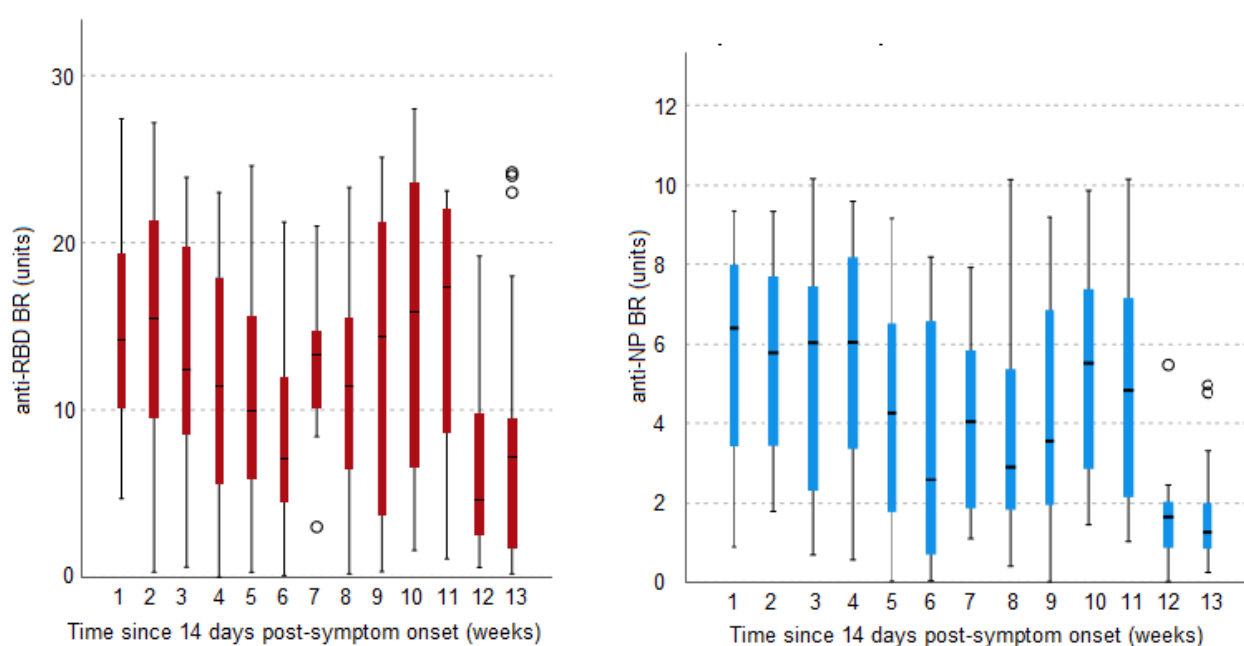

**Supplementary figure 1. Binding ratio distribution of anti-RBD and anti-NP values per week beginning at 14 days post symptom onset (listed as week 1), London, United Kingdom, 17 April-17 July 2020 (n=906).** BR=binding ratio, anti-NP = anti-nucleocapsid antibody, anti-RBD = anti-receptor binding domain antibody. Demonstration of measured variability in individual anti-RBD and anti-NP BR values using the Kruskal-Wallis test. Week 1 therefore begins on day 15 post-symptom onset.

Dunn's post hoc analysis for anti-RBD BR

| Week-week comparison | Test Statistic | Std. Error | Std. Test Statistic | Sig.  | Adj. Sig. <sup>a</sup> |
|----------------------|----------------|------------|---------------------|-------|------------------------|
| 12.00-6.00           | 15.425         | 29.095     | .530                | .596  | 1.000                  |
| 12.00-13.00          | -16.543        | 27.790     | -.595               | .552  | 1.000                  |
| 12.00-5.00           | 45.175         | 27.790     | 1.626               | .104  | 1.000                  |
| 12.00-8.00           | 47.075         | 26.024     | 1.809               | .070  | 1.000                  |
| 12.00-4.00           | 52.950         | 27.431     | 1.930               | .054  | 1.000                  |
| 12.00-9.00           | 62.212         | 25.592     | 2.431               | .015  | 1.000                  |
| 12.00-7.00           | 66.363         | 36.288     | 1.829               | .067  | 1.000                  |
| 12.00-3.00           | 72.055         | 26.024     | 2.769               | .006  | .439                   |
| 12.00-2.00           | 84.304         | 24.879     | 3.389               | <.001 | .055                   |
| 12.00-11.00          | 85.436         | 26.522     | 3.221               | .001  | .100                   |
| 12.00-10.00          | 86.514         | 25.396     | 3.407               | <.001 | .051                   |
| 12.00-1.00           | 86.778         | 23.858     | 3.637               | <.001 | .021                   |
| 6.00-13.00           | -1.118         | 29.434     | -.038               | .970  | 1.000                  |
| 6.00-5.00            | 29.750         | 29.434     | 1.011               | .312  | 1.000                  |
| 6.00-8.00            | -31.650        | 27.772     | -1.140              | .254  | 1.000                  |
| 6.00-4.00            | 37.525         | 29.095     | 1.290               | .197  | 1.000                  |
| 6.00-9.00            | -46.787        | 27.368     | -1.710              | .087  | 1.000                  |
| 6.00-7.00            | -50.937        | 37.562     | -1.356              | .175  | 1.000                  |
| 6.00-3.00            | 56.630         | 27.772     | 2.039               | .041  | 1.000                  |
| 6.00-2.00            | 68.879         | 26.703     | 2.579               | .010  | .772                   |
| 6.00-11.00           | -70.011        | 28.239     | -2.479              | .013  | 1.000                  |
| 6.00-10.00           | -71.089        | 27.185     | -2.615              | .009  | .696                   |
| 6.00-1.00            | 71.353         | 25.753     | 2.771               | .006  | .436                   |
| 13.00-5.00           | 28.632         | 28.144     | 1.017               | .309  | 1.000                  |
| 13.00-8.00           | 30.532         | 26.401     | 1.156               | .248  | 1.000                  |
| 13.00-4.00           | 36.407         | 27.790     | 1.310               | .190  | 1.000                  |
| 13.00-9.00           | 45.669         | 25.976     | 1.758               | .079  | 1.000                  |
| 13.00-7.00           | 49.819         | 36.560     | 1.363               | .173  | 1.000                  |
| 13.00-3.00           | 55.512         | 26.401     | 2.103               | .036  | 1.000                  |
| 13.00-2.00           | 67.761         | 25.274     | 2.681               | .007  | .572                   |
| 13.00-11.00          | 68.892         | 26.892     | 2.562               | .010  | .812                   |
| 13.00-10.00          | 69.971         | 25.783     | 2.714               | .007  | .519                   |
| 13.00-1.00           | 70.234         | 24.269     | 2.894               | .004  | .297                   |
| 5.00-8.00            | -1.900         | 26.401     | -.072               | .943  | 1.000                  |
| 5.00-4.00            | 7.775          | 27.790     | .280                | .780  | 1.000                  |
| 5.00-9.00            | -17.037        | 25.976     | -.656               | .512  | 1.000                  |
| 5.00-7.00            | -21.187        | 36.560     | -.580               | .562  | 1.000                  |
| 5.00-3.00            | 26.880         | 26.401     | 1.018               | .309  | 1.000                  |
| 5.00-2.00            | 39.129         | 25.274     | 1.548               | .122  | 1.000                  |
| 5.00-11.00           | -40.261        | 26.892     | -1.497              | .134  | 1.000                  |
| 5.00-10.00           | -41.339        | 25.783     | -1.603              | .109  | 1.000                  |
| 5.00-1.00            | 41.603         | 24.269     | 1.714               | .086  | 1.000                  |
| 8.00-4.00            | 5.875          | 26.024     | .226                | .821  | 1.000                  |
| 8.00-9.00            | -15.137        | 24.077     | -.629               | .530  | 1.000                  |
| 8.00-7.00            | 19.288         | 35.236     | .547                | .584  | 1.000                  |
| 8.00-3.00            | 24.980         | 24.535     | 1.018               | .309  | 1.000                  |
| 8.00-2.00            | 37.229         | 23.318     | 1.597               | .110  | 1.000                  |
| 8.00-11.00           | -38.361        | 25.063     | -1.531              | .126  | 1.000                  |
| 8.00-10.00           | -39.439        | 23.869     | -1.652              | .098  | 1.000                  |
| 8.00-1.00            | 39.703         | 22.225     | 1.786               | .074  | 1.000                  |
| 4.00-9.00            | -9.262         | 25.592     | -.362               | .717  | 1.000                  |
| 4.00-7.00            | -13.412        | 36.288     | -.370               | .712  | 1.000                  |
| 4.00-3.00            | 19.105         | 26.024     | .734                | .463  | 1.000                  |
| 4.00-2.00            | 31.354         | 24.879     | 1.260               | .208  | 1.000                  |
| 4.00-11.00           | -32.486        | 26.522     | -1.225              | .221  | 1.000                  |
| 4.00-10.00           | -33.564        | 25.396     | -1.322              | .186  | 1.000                  |
| 4.00-1.00            | 33.828         | 23.858     | 1.418               | .156  | 1.000                  |
| 9.00-7.00            | 4.150          | 34.918     | .119                | .905  | 1.000                  |
| 9.00-3.00            | 9.843          | 24.077     | .409                | .683  | 1.000                  |
| 9.00-2.00            | 22.092         | 22.835     | .967                | .333  | 1.000                  |
| 9.00-11.00           | -23.224        | 24.614     | -.944               | .345  | 1.000                  |
| 9.00-10.00           | -24.302        | 23.397     | -1.039              | .299  | 1.000                  |
| 9.00-1.00            | 24.566         | 21.717     | 1.131               | .258  | 1.000                  |
| 7.00-3.00            | 5.693          | 35.236     | .162                | .872  | 1.000                  |
| 7.00-2.00            | 17.942         | 34.400     | .522                | .602  | 1.000                  |
| 7.00-11.00           | -19.073        | 35.606     | -.536               | .592  | 1.000                  |
| 7.00-10.00           | -20.152        | 34.776     | -.579               | .562  | 1.000                  |
| 7.00-1.00            | 20.415         | 33.668     | .606                | .544  | 1.000                  |
| 3.00-2.00            | 12.249         | 23.318     | .525                | .599  | 1.000                  |
| 3.00-11.00           | -13.381        | 25.063     | -.534               | .593  | 1.000                  |
| 3.00-10.00           | -14.459        | 23.869     | -.606               | .545  | 1.000                  |
| 3.00-1.00            | 14.723         | 22.225     | .662                | .508  | 1.000                  |
| 2.00-11.00           | -1.132         | 23.873     | -.047               | .962  | 1.000                  |
| 2.00-10.00           | -2.210         | 22.616     | -.098               | .922  | 1.000                  |
| 2.00-1.00            | 2.474          | 20.873     | .119                | .906  | 1.000                  |
| 11.00-10.00          | 1.078          | 24.411     | .044                | .965  | 1.000                  |
| 11.00-1.00           | 1.342          | 22.806     | .059                | .953  | 1.000                  |
| 10.00-1.00           | .263           | 21.487     | .012                | .990  | 1.000                  |

Each row tests the null hypothesis that the Sample 1 and Sample 2 distributions are the same.

Asymptotic significances (2-sided tests) are displayed. The significance level is .050.

a. Significance values have been adjusted by the Bonferroni correction for multiple tests.

Dunn's post hoc analysis for anti-NP BR

| Week-week comparison | Test Statistic | Std. Error | Std. Test Statistic | Sig.  | Adj. Sig. <sup>a</sup> |
|----------------------|----------------|------------|---------------------|-------|------------------------|
| 13.00-12.00          | .955           | 27.790     | .034                | .973  | 1.000                  |
| 13.00-6.00           | 55.262         | 29.434     | 1.877               | .060  | 1.000                  |
| 13.00-8.00           | 66.865         | 26.402     | 2.533               | .011  | .883                   |
| 13.00-7.00           | 78.293         | 36.560     | 2.141               | .032  | 1.000                  |
| 13.00-5.00           | 85.684         | 28.144     | 3.044               | .002  | .182                   |
| 13.00-9.00           | 87.809         | 25.976     | 3.380               | <.001 | .056                   |
| 13.00-11.00          | 96.562         | 26.893     | 3.591               | <.001 | .026                   |
| 13.00-10.00          | 120.498        | 25.784     | 4.673               | <.001 | .000                   |
| 13.00-3.00           | 121.365        | 26.402     | 4.597               | <.001 | .000                   |
| 13.00-4.00           | 126.305        | 27.790     | 4.545               | <.001 | .000                   |
| 13.00-2.00           | 128.831        | 25.274     | 5.097               | <.001 | .000                   |
| 13.00-1.00           | 135.451        | 24.269     | 5.581               | <.001 | .000                   |
| 12.00-6.00           | 54.306         | 29.096     | 1.866               | .062  | 1.000                  |
| 12.00-8.00           | 65.910         | 26.024     | 2.533               | .011  | .883                   |
| 12.00-7.00           | 77.338         | 36.289     | 2.131               | .033  | 1.000                  |
| 12.00-5.00           | 84.729         | 27.790     | 3.049               | .002  | .179                   |
| 12.00-9.00           | 86.854         | 25.592     | 3.394               | <.001 | .054                   |
| 12.00-11.00          | 95.607         | 26.522     | 3.605               | <.001 | .024                   |
| 12.00-10.00          | 119.543        | 25.397     | 4.707               | <.001 | .000                   |
| 12.00-3.00           | 120.410        | 26.024     | 4.627               | <.001 | .000                   |
| 12.00-4.00           | 125.350        | 27.432     | 4.570               | <.001 | .000                   |
| 12.00-2.00           | 127.876        | 24.879     | 5.140               | <.001 | .000                   |
| 12.00-1.00           | 134.496        | 23.858     | 5.637               | <.001 | .000                   |
| 6.00-8.00            | -11.604        | 27.772     | -.418               | .676  | 1.000                  |
| 6.00-7.00            | -23.031        | 37.562     | -.613               | .540  | 1.000                  |
| 6.00-5.00            | 30.423         | 29.434     | 1.034               | .301  | 1.000                  |
| 6.00-9.00            | -32.547        | 27.368     | -1.189              | .234  | 1.000                  |
| 6.00-11.00           | -41.300        | 28.240     | -1.462              | .144  | 1.000                  |
| 6.00-10.00           | -65.237        | 27.186     | -2.400              | .016  | 1.000                  |
| 6.00-3.00            | 66.104         | 27.772     | 2.380               | .017  | 1.000                  |
| 6.00-4.00            | 71.044         | 29.096     | 2.442               | .015  | 1.000                  |
| 6.00-2.00            | 73.570         | 26.703     | 2.755               | .006  | .458                   |
| 6.00-1.00            | 80.190         | 25.754     | 3.114               | .002  | .144                   |
| 8.00-7.00            | 11.428         | 35.236     | .324                | .746  | 1.000                  |
| 8.00-5.00            | 18.819         | 26.402     | .713                | .476  | 1.000                  |
| 8.00-9.00            | -20.944        | 24.077     | -.870               | .384  | 1.000                  |
| 8.00-11.00           | -29.697        | 25.063     | -1.185              | .236  | 1.000                  |
| 8.00-10.00           | -53.633        | 23.869     | -2.247              | .025  | 1.000                  |
| 8.00-3.00            | 54.500         | 24.536     | 2.221               | .026  | 1.000                  |
| 8.00-4.00            | 59.440         | 26.024     | 2.284               | .022  | 1.000                  |
| 8.00-2.00            | 61.966         | 23.318     | 2.657               | .008  | .614                   |
| 8.00-1.00            | 68.586         | 22.225     | 3.086               | .002  | .158                   |
| 7.00-5.00            | 7.391          | 36.560     | .202                | .840  | 1.000                  |
| 7.00-9.00            | -9.516         | 34.919     | -.273               | .785  | 1.000                  |
| 7.00-11.00           | -18.269        | 35.606     | -.513               | .608  | 1.000                  |
| 7.00-10.00           | -42.205        | 34.776     | -1.214              | .225  | 1.000                  |
| 7.00-3.00            | 43.073         | 35.236     | 1.222               | .222  | 1.000                  |
| 7.00-4.00            | 48.013         | 36.289     | 1.323               | .186  | 1.000                  |
| 7.00-2.00            | 50.538         | 34.400     | 1.469               | .142  | 1.000                  |
| 7.00-1.00            | 57.159         | 33.668     | 1.698               | .090  | 1.000                  |
| 5.00-9.00            | -2.125         | 25.976     | -.082               | .935  | 1.000                  |
| 5.00-11.00           | -10.878        | 26.893     | -.404               | .686  | 1.000                  |
| 5.00-10.00           | -34.814        | 25.784     | -1.350              | .177  | 1.000                  |
| 5.00-3.00            | 35.681         | 26.402     | 1.351               | .177  | 1.000                  |
| 5.00-4.00            | 40.621         | 27.790     | 1.462               | .144  | 1.000                  |
| 5.00-2.00            | 43.147         | 25.274     | 1.707               | .088  | 1.000                  |
| 5.00-1.00            | 49.767         | 24.269     | 2.051               | .040  | 1.000                  |
| 9.00-11.00           | -8.753         | 24.614     | -.356               | .722  | 1.000                  |
| 9.00-10.00           | -32.689        | 23.398     | -1.397              | .162  | 1.000                  |
| 9.00-3.00            | 33.556         | 24.077     | 1.394               | .163  | 1.000                  |
| 9.00-4.00            | 38.496         | 25.592     | 1.504               | .133  | 1.000                  |
| 9.00-2.00            | 41.022         | 22.835     | 1.796               | .072  | 1.000                  |
| 9.00-1.00            | 47.642         | 21.717     | 2.194               | .028  | 1.000                  |
| 11.00-10.00          | 23.936         | 24.411     | .981                | .327  | 1.000                  |
| 11.00-3.00           | 24.803         | 25.063     | .990                | .322  | 1.000                  |
| 11.00-4.00           | 29.743         | 26.522     | 1.121               | .262  | 1.000                  |
| 11.00-2.00           | 32.269         | 23.873     | 1.352               | .176  | 1.000                  |
| 11.00-1.00           | 38.890         | 22.806     | 1.705               | .088  | 1.000                  |
| 10.00-3.00           | .867           | 23.869     | .036                | .971  | 1.000                  |
| 10.00-4.00           | 5.807          | 25.397     | .229                | .819  | 1.000                  |
| 10.00-2.00           | 8.333          | 22.616     | .368                | .713  | 1.000                  |
| 10.00-1.00           | 14.953         | 21.487     | .696                | .486  | 1.000                  |
| 3.00-4.00            | -4.940         | 26.024     | -.190               | .849  | 1.000                  |
| 3.00-2.00            | 7.466          | 23.318     | .320                | .749  | 1.000                  |
| 3.00-1.00            | 14.086         | 22.225     | .634                | .526  | 1.000                  |
| 4.00-2.00            | 2.526          | 24.879     | .102                | .919  | 1.000                  |
| 4.00-1.00            | 9.146          | 23.858     | .383                | .701  | 1.000                  |
| 2.00-1.00            | 6.620          | 20.873     | .317                | .751  | 1.000                  |

Each row tests the null hypothesis that the Sample 1 and Sample 2 distributions are the same.

Asymptotic significances (2-sided tests) are displayed. The significance level is .050.

a. Significance values have been adjusted by the Bonferroni correction for multiple tests.

**Supplementary figure 2. Dunn's post hoc pairwise comparisons for week-by-week variation in binding ratio values against time since symptom onset, London, United Kingdom, 17 April-17 July 2020 (n=906). BR=binding ratio, anti-NP = anti-nucleocapsid antibody, anti-RBD = anti-receptor binding domain antibody. Sig = significance. Week 1 therefore begins on day 15 post-symptom onset. Adjusted significance values have been calculated by use of the Bonferroni correction for multiple tests.**
